# Supplementary material for: Identification of jasmonic acid-associated microRNAs and characterization of the regulatory roles of the miR319/TCP4 module under root-knot nematode stress in tomato
Source: PubMed Central journal article supplement (PMC4507771; doi:10.1093/jxb/erv238), 2015-05-22
Supplement: supp_erv238_jexbot148080_file002.pdf [file supp_erv238_jexbot148080_file002.pdf]

Table S1 The primers of stem-loop RT-PCR and qRT-PCR

| miRNA   | Primers                                                                                                        |                                                          |
|---------|----------------------------------------------------------------------------------------------------------------|----------------------------------------------------------|
| miR156a | RT: GTTGGCTCTGGTGCAGGGTCCGAGGTATTTCGCACCAGAGCCAACGTGCTC<br>F: CGGCGGTTGACAGAAGATAG & R: GTGCAGGGTCCGAGGTATTC   |                                                          |
| miR159a | RT: GTTGGCTCTGGTGCAGGGTCCGAGGTATTTCGCACCAGAGCCAACACTAGAGC<br>F: CGGCGGTTTGGATTGAAGGG & R: GTGCAGGGTCCGAGGTATTC |                                                          |
| miR172a | RT: GTTGGCTCTGGTGCAGGGTCCGAGGTATTTCGCACCAGAGCCAACATGCAG<br>F: CGGCGAGAATCTTGATGATG & R: GTGCAGGGTCCGAGGTATTC   |                                                          |
| miR396a | RT: GTCGTATCCAGTGCAGGGTCCGAGGTATTTCGCACTGGATACGACTTCCCAC<br>F: CGCCACAGTTCAATAAAGCT & R: TCGTATCCAGTGCAGGGTC   |                                                          |
| miR396b | RT: GTCGTATCCAGTGCAGGGTCCGAGGTATTTCGCACTGGATACGAAAGTTCAA<br>F: GTCAGCATCCACAGCTTTC & R: TCGTATCCAGTGCAGGGTC    |                                                          |
| miR319b | RT: GTCGTATCCAGTGCAGGGTCCGAGGTATTTCGCACTGGATACGAGGGAGCTC<br>F: GCATTGGATTGGACTGAAGG & R: TCGTATCCAGTGCAGGGTC   |                                                          |
| U6      | F: TCTAACAGTGTAGTTTGTCCCTTCG<br>R: TTGTGCGTGTATCCTTGC                                                          |                                                          |
| miRNAs  | Targets                                                                                                        | Primers                                                  |
|         | <i>β-actin</i>                                                                                                 | F: GGAATGGGACAGAAGGAT<br>R: CAGTCAGGAGAACAGGGT           |
| miR396  | Solyc07g041640.2.1<br>(GRF1)                                                                                   | F: CAGATGGAAAGAAATGGA<br>R: TGTTGATGATGATGTGTT           |
| miR396  | Solyc02g092070.2.1<br>(GRF2)                                                                                   | F: GGTCCTCTACTATGCTCAG<br>R: AGAATCAAACAATGGGAAAGG       |
| miR396  | Solyc10g083510.1.1<br>(GRF3)                                                                                   | F: AACCAACAACATCAACAACA<br>R: CCACCACTTCCAATCCTT         |
| miR396  | Solyc08g005430.2.1<br>(GRF4)                                                                                   | F: GGTCTTTCAGTCATCCTA<br>R: GTCCTTCTACATCTCCT            |
| miR156a | Solyc10g078700.1.1<br>(SBP)                                                                                    | F: TGTTGTTGCTGGTCTTGA<br>R: CTTCTACGACGCTCATT            |
| miR159a | Solyc01g009070.2.1<br>(MYB)                                                                                    | F: CTCATTGGGCTCTTCCTT<br>R: ATTACCAGATGTCTCGTTCC         |
| miR159a | Solyc06g008320.2.1<br>(Serine/threonine protein<br>kinase)                                                     | F: GACCTACAGACTCACAAGCATA<br>R: CATAAGCACATAGCCAAGAGATTC |
| miR172a | Solyc04g049800.2.1<br>(AP2-Like ERF)                                                                           | F: ATATGCTCACCAGACAACTT<br>R: AATGTAACGCCACGATACT        |
| miR319b | Solyc03g115010.1.1<br>(TCP4)                                                                                   | F: CTGATGCTATTGCTGATA<br>R: GCTATTGGCTCTTGATAA           |

---

JA related genes & Mi

Primers

---

|      |                                                                   |
|------|-------------------------------------------------------------------|
| LOXD | F: CATTGCCATTGAACTTAG<br>R: GAACTCCAGCATCATTAG                    |
| AOS1 | F: CATCGTCTTATCGTGTTA<br>R: GAAGTAATCAAGTCTGTCT                   |
| AOC1 | F: ACTTACTACCACCTCTAC<br>R: AGTGTTAGTTGAATCTGTT                   |
| OPR3 | F: CACGGTACTTGATTGAT<br>R: CTATTGCTGAGACTACTG                     |
| Mi-1 | F: GCAATCTAGATCTAGCTATTGTTGTC<br>R: CCTGCTCGTTTACCATTACTTTTCCAACC |

---
